# Supplementary material for: Gene mutation analysis of oral submucous fibrosis cancerization in Hainan Island
Source: PeerJ journal article supplement (doi:10.7717/peerj.16392), 2023-11-30
Supplement: Raw_data.zip [file Raw_data.zip]

## Sheet: sheet1
Serial_Number
